# Supplementary material
Source: Research Square preprint supplement (doi:10.21203/rs.3.rs-6935995/v1)
Supplement: Supplementary file 1 [file 80db0b9daa76ba328fbe93e7.docx]

**QUESTIONNAIRES: NURSES’ KNOWLEDGE REGARDING MAGGOT DEBRIDEMENT THERAPY**

**PART I: SOCIO-DEMOGRAPHIC DATA**

**Instruction:** Please state or tick (√) at the appropriate box which best corresponds to your response.

1. Age (Years)(Please state): ______

1. Highest Nursing Education Level:


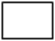
 Diploma
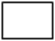
 Diploma with post-basic


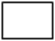
 Degree
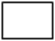
 Degree with post-basic Master

1. Workplace:


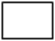
 Medical
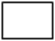
 Surgical

1. Year of working experience (Please state): ________

1. Heard of Maggot Debridement Therapy (MDT)


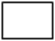
 Yes
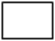
 No

1. Performed MDT on a patient


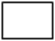
 Yes
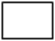
 No

**PART II: KNOWLEDGE OF MAGGOT DEBRIDEMENT THERAPY**

**Instruction:** This part consists of 20 items in which participants are required to choose between three responses, such as “True”, “False”, or “Unsure”. You are required to read each statement and decide on the answer. Please mark a tick (√) in the column for the answer that best describes your views.

| **No.** | **Knowledge Statement** | **True** | **False** | **Unsure** |
| --- | --- | --- | --- | --- |
| 1 | *Lucilia cuprina* is the species used for MDT in Malaysia. |  |  |  |
| 2 | Maggots require oxygen. |  |  |  |
| 3 | Maggots secrete digestive enzymes. |  |  |  |
| 4 | Sterile, medical-grade maggots are used. |  |  |  |
| 5 | Larvae are left on a wound for two or three days before being removed. |  |  |  |
| 6 | Used larvae are treated as infectious clinical waste. |  |  |  |
| 7 | Maggots help break down dead tissue. |  |  |  |
| 8 | Maggots have selective debridement. |  |  |  |
| 9 | Maggots help reduce infection risk. |  |  |  |
| 10 | Maggots help dissolve the biofilm. |  |  |  |
| 11 | Maggots help accelerate wound healing. |  |  |  |
| 12 | Maggots have antimicrobial properties. |  |  |  |
| 13 | Maggots stimulate the growth of healthy tissue. |  |  |  |
| 14 | Maggots are suitable for pressure ulcers. |  |  |  |
| 15 | Maggots are suitable for neuropathic foot ulcers. |  |  |  |
| 16 | Maggots are suitable for non-healing traumatic wounds. |  |  |  |
| 17 | A range of 5 to 10 maggots per cm2 of wound surface is recommended. |  |  |  |
| 18 | A wound is washed with sterile water or saline after a 72-hour maggot therapy session. |  |  |  |
| 19 | New maggots can be reapplied as needed. |  |  |  |
| 20 | Pain is a common side effect. |  |  |  |

Thank you for completing and participating in this survey.
